# Supplementary material for: An investigation of the selectivity behaviour of host compound (R,R)-(−)-2,3-dimethoxy-1,1,4,4-tetraphenylbutane-1,4-diol in mixed cresols
Source: Royal Society of Chemistry journal article supplement (doi:10.1039/d3ce00101f), 2023-01-01
Supplement: d3ce00101f1.pdf [file d3ce00101f1.pdf]

## SUPPORTING INFORMATION

### An investigation of the selectivity behaviour of host compound (*R,R*)-(-)-2,3-dimethoxy-1,1,4,4-tetraphenylbutane-1,4-diol in mixed cresols

Benita Barton,\* Pieter L. Pohl and Eric C. Hosten

Department of Chemistry, PO Box 77000, Nelson Mandela University, Port Elizabeth, 6031, South Africa.

E-mail: [benita.barton@mandela.ac.za](mailto:benita.barton@mandela.ac.za)

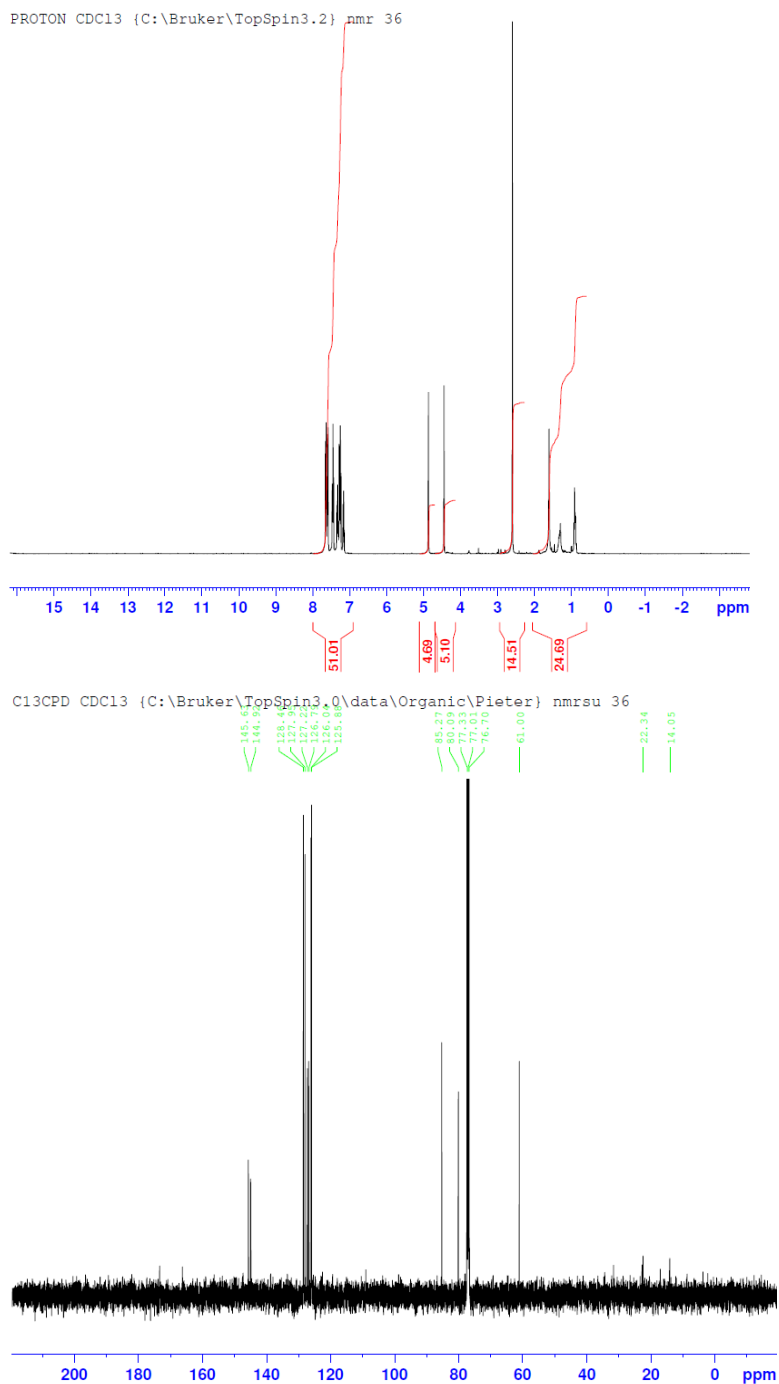

Fig. S1 <sup>1</sup>H- (top) and <sup>13</sup>C- (bottom) NMR spectra for H2.

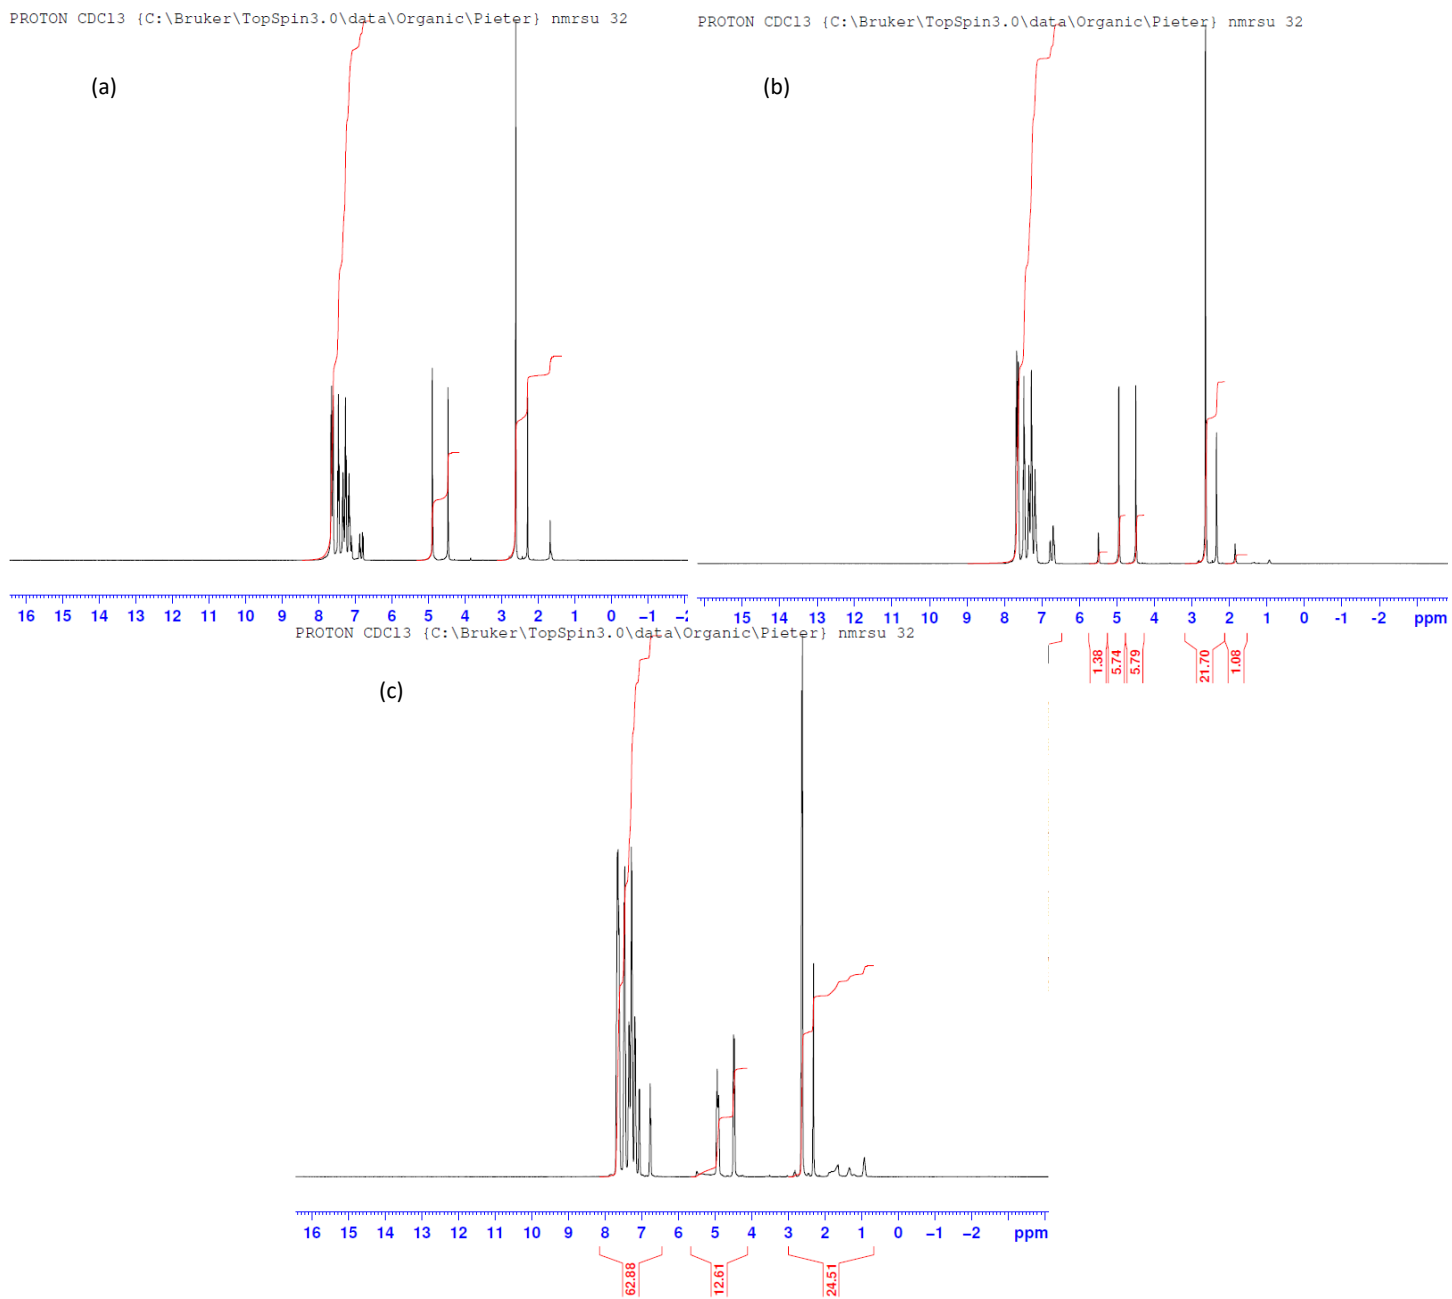

**Fig. S2**  $^1\text{H}$ -NMR spectra for (a)  $2(\text{H}_2)\cdot 2\text{Cr}$ , (b)  $2(\text{H}_2)\cdot 3\text{Cr}$  and (c)  $2(\text{H}_2)\cdot 4\text{Cr}$ .
